# Supplementary material for: Improved Diagnostic Imaging of Brain Tumors by Multimodal Microscopy and Deep Learning
Source: PubMed Central journal article supplement (PMC7408054; doi:10.3390/cancers12071806), 2020-07-06
Supplement: cancers-12-01806-s001.pdf [file cancers-12-01806-s001.pdf]

**Supplementary Materials**

**Table S1.** Clinical patient data with patient ID, age in years (yrs), gender (f – female, m – male), location and diagnosis according to the 2016 WHO Classification of Tumors of the Central Nervous System.

| Patient ID | Age    | Gender | Location                          | Diagnosis                                                                |
|------------|--------|--------|-----------------------------------|--------------------------------------------------------------------------|
| 1          | 73 yrs | m      | Frontal right                     | Secondary glioblastoma, IDH mutant (WHO IV)                              |
| 2          | 50 yrs | m      | Intraaxial temporal               | Glioblastoma, IDH wildtype (WHO IV)                                      |
| 3          | 56 yrs | f      | Insular                           | Anaplastic oligodendroglioma, IDH mutant and 1p/19q co-deleted (WHO III) |
| 4          | 73 yrs | f      | Intraaxial occipital              | Glioblastoma, IDH wildtype (WHO IV)                                      |
| 5          | 55 yrs | f      | Frontal                           | Lung cancer metastasis                                                   |
| 6          | 60 yrs | f      | Intraaxial occipital              | Lung cancer metastasis                                                   |
| 7          | 67 yrs | f      | Cerebellar                        | Lung cancer metastasis                                                   |
| 8          | 58 yrs | m      | Intraaxial frontal right          | Lung cancer metastasis                                                   |
| 9          | 48 yrs | f      | Parietal left                     | Glioblastoma, IDH wildtype (WHO IV)                                      |
| 10         | 38 yrs | m      | Temporal left                     | Diffuse astrocytoma, IDH mutant (WHO II)                                 |
| 11         | 41 yrs | f      | Intraaxial insular right          | Oligodendroglioma, IDH mutant and 1p/19q co-deleted (WHO II)             |
| 12         | 40 yrs | f      | Intraaxial parietal left          | Diffuse astrocytoma, IDH mutant (WHO II)                                 |
| 13         | 46 yrs | f      | Frontal left                      | Anaplastic astrocytoma, IDH mutant (WHO III)                             |
| 14         | 42 yrs | m      | Frontotemporal right              | Glioblastoma, IDH wildtype (WHO IV)                                      |
| 15         | 53 yrs | m      | Parietal left                     | Glioblastoma, IDH wildtype (WHO IV)                                      |
| 16         | 55 yrs | f      | Gyrus cinguli                     | Diffuse astrocytoma, IDH mutant (WHO II)                                 |
| 17         | 39 yrs | f      | Frontal right                     | Glioblastoma, IDH wildtype (WHO IV)                                      |
| 18         | 78 yrs | f      | Frontal left                      | Diffuse astrocytoma, IDH mutant (WHO II)                                 |
| 19         | 75 yrs | f      | Intraaxial temporal               | Secondary glioblastoma, IDH mutant (WHO IV)                              |
| 20         | 67 yrs | m      | Intraaxial temporal left          | Glioblastoma, IDH wildtype (WHO IV)                                      |
| 21         | 38 yrs | m      | Intraaxial parieto-occipital left | Glioblastoma, IDH wildtype (WHO IV)                                      |
| 22         | 30 yrs | m      | Prepostcentral                    | Anaplastic astrocytoma, IDH mutant (WHO III)                             |
| 23         | 88 yrs | m      | Frontal left                      | Glioblastoma, IDH wildtype (WHO IV)                                      |
| 24         | 72 yrs | m      | Temporal right                    | Glioblastoma, IDH wildtype (WHO IV)                                      |

|    |           |   |                              |                                                                          |
|----|-----------|---|------------------------------|--------------------------------------------------------------------------|
| 25 | 60<br>yrs | f | Intraaxial                   | Control                                                                  |
| 26 | 42<br>yrs | m | Intraaxial temporal          | Anaplastic oligodendroglioma, IDH mutant and 1p/19q co-deleted (WHO III) |
| 27 | 68<br>yrs | m | Intraaxial temporal<br>right | Gliosarcoma, IDH wildtype (WHO IV)                                       |
| 28 | 52<br>yrs | m | Parietal                     | Oligodendroglioma, IDH mutant and 1p/19q co-deleted (WHO II)             |
| 29 | 65<br>yrs | f | Intraaxial temporal          | Anaplastic astrocytoma, IDH wildtype (WHO III)                           |
| 30 | 43<br>yrs | f | Intraaxial frontal right     | Anaplastic glioma, IDH wildtype, NOS (WHO II)                            |
| 31 | 50<br>yrs | f | Intraaxial frontal left      | Lung cancer metastasis                                                   |
| 32 | 62<br>yrs | m | Hemispherical right          | Glioblastoma, IDH wildtype (WHO IV)                                      |
| 33 | 62<br>yrs | m | Frontal                      | Anaplastic astrocytoma, IDH mutant (WHO III)                             |
| 34 | 52<br>yrs | m | Intraaxial temporal          | Anaplastic oligodendroglioma, IDH mutant and 1p/19q co-deleted (WHO III) |
| 35 | 53<br>yrs | m | Intraaxial                   | Oligodendroglioma, IDH mutant and 1p/19q co-deleted (WHO II)             |
| 36 | 80<br>yrs | m | Temporal                     | Secondary glioblastoma, IDH mutant (WHO IV)                              |
| 37 | 67<br>yrs | m | Intraaxial frontal           | Glioblastoma, IDH wildtype (WHO IV)                                      |
| 38 | 34<br>yrs | m | Intraaxial temporal<br>right | Diffuse astrocytoma, IDH mutant (WHO II)                                 |
| 39 | 75<br>yrs | m | Intraaxial occipital         | Glioblastoma, IDH wildtype (WHO IV)                                      |
| 40 | 55<br>yrs | m | Cerebellar                   | Lung cancer metastasis                                                   |
| 41 | 31<br>yrs | f | N.A.                         | Glioblastoma, IDH wildtype (WHO IV)                                      |
| 42 | 75<br>yrs | f | Intraaxial parietal          | Lung cancer metastasis                                                   |

**Table S2.** Image parameters according to histological glioma subtype.

| Tissue Type                                        | Parameter           | Oligodendroglioma<br>(WHO II and III, <i>n</i> = 11) | Astrocytoma<br>(WHO II and III, <i>n</i> = 23) |
|----------------------------------------------------|---------------------|------------------------------------------------------|------------------------------------------------|
| Brain parenchyma<br>( <i>n</i> = 1 for ODG and AC) | Median attenuation  | 5.20 mm <sup>-1</sup>                                | 3.50 mm <sup>-1</sup>                          |
|                                                    | Median fluorescence | 0.24                                                 | 0.09                                           |
|                                                    | Median cell density | 1422/mm <sup>2</sup>                                 | 1251/mm <sup>2</sup>                           |
| Infiltration zone                                  | Median attenuation  | 3.10 ± 0.47 mm <sup>-1</sup>                         | 3.00 ± 0.99 mm <sup>-1</sup>                   |
|                                                    | Median fluorescence | 0.32 ± 0.17                                          | 0.28 ± 0.15                                    |
|                                                    | Median cell density | 2482 ± 1670/mm <sup>2</sup>                          | 2362 ± 845/mm <sup>2</sup>                     |
| Tumor core                                         | Median attenuation  | 3.2 ± 0.21 mm <sup>-1</sup>                          | 2.70 ± 0.39 mm <sup>-1</sup>                   |
|                                                    | Median fluorescence | 0.31 ± 0.14                                          | 0.23 ± 0.11                                    |
|                                                    | Median cell density | 2868 ± 166/mm <sup>2</sup>                           | 3550 ± 788/mm <sup>2</sup>                     |

**Table S3.** Image parameters according to IDH mutation status.

| Tissue Type       | Parameter           | IDH Wildtype ( <i>n</i> = 5) | IDH Mutant ( <i>n</i> = 29)  |
|-------------------|---------------------|------------------------------|------------------------------|
| Brain parenchyma  | Median attenuation  | <i>n</i> = 0                 | 4.35 ± 1.20 mm <sup>-1</sup> |
|                   | Median fluorescence | <i>n</i> = 0                 | 0.17 ± 0.11                  |
|                   | Median cell density | <i>n</i> = 0                 | 1336 ± 121/mm <sup>2</sup>   |
| Infiltration zone | Median attenuation  | 2.17 ± 0.46 mm <sup>-1</sup> | 3.24 ± 0.82 mm <sup>-1</sup> |
|                   | Median fluorescence | 0.42 ± 0.08                  | 0.27 ± 0.15                  |
|                   | Median cell density | 1982 ± 660/mm <sup>2</sup>   | 2466 ± 1552/mm <sup>2</sup>  |
| Tumor core        | Median attenuation  | 2.31 ± 0.21 mm <sup>-1</sup> | 3.01 ± 0.30 mm <sup>-1</sup> |
|                   | Median fluorescence | 0.16 ± 0.15                  | 0.28 ± 0.11                  |
|                   | Median cell density | 4287 ± 897/mm <sup>2</sup>   | 3083 ± 478/mm <sup>2</sup>   |
